# Supplementary material
Source: HighWire-hosted journal article supplement (doi:10.1101/rna.078940.121)
Supplement: Supplemental_Legends_.docx [file Supplemental_Legends_.docx]

**Supplementary Figure Legends**

**Supplementary Figure 1.** Previously reported mRNA and long non-coding RNA (lncRNA) ψ sites reported in the PIANO database that are also detected by PA-ψ-seq. A) MRSP21, B)ABCA13, C) RPS24, D) ALG10, E) WDR74 and F) HFM1. Blue bars represent the ψ site. Exact position and sequence of these sites is given in Supp. Table 1.

**Supplementary Figure 2.** Metagene analysis of the relative location of ψ residues across the 5’UTR, CDS and 3’UTR of cellular mRNAs. Peaks from PA-ψ-seq of 293T-derived mRNAs were called using MACS2, and the called peak distribution on cellular transcripts analyzed by MetaplotR.

**Supplementary Figure 3.** DNA sequence analysis of the mutations introduced into the genomic copies of the *pus1, pus7* and *trub1* gene in 293T cells by gene editing using CRISPR/Cas. The location of relevant coding exons and the location and extent of introduced deletion and missense mutations is indicated.

**Supplementary Figure 4.** Growth curves comparing the rate of growth of the indicated mutant 293T clonal cell lines with wild type 293T cells. Live cells were counted daily over a 5-day period. Average of three biological replicates with SD indicated.

**Supplementary Figure** 5. Validation of mRNA sample purity. Total RNA was subjected to two rounds of oligo-dT affinity purification to capture polyA mRNA, followed by RiboZero rRNA depletion. (A) Bioanalyzer 2100 analysis of RNA samples, including representative electropherograms. L = ladder, lanes 1-9 show mRNA samples as annotated in image, lanes 10-12 show total RNA prior to mRNA isolation. Note the absence of rRNA bands or peaks in highly purified mRNA. (B) Modified nucleosides were measured from total and mRNA samples by UPLC-MS/MS. Average m6,6A and t6A levels are shown as % of the unmodified nucleotide (mod/unmod*100); these modifications are specific for rRNA and tRNA, respectively. Neither modification was detected above the lower limit of detection in these highly purified mRNA samples.

**Supplementary Table Legends**

**Table S1. PA-ψ-seq run list. Table S1**. Table S1 depicts the sequencing depth in millions of reads for each dataset analyzed in this study. Cells were pulsed with either 4SU or 6SG. Total poly(A)+ RNA was isolated and then immunoprecipitated using either an anti-ᴪ or anti-m6A antibody. RNA recovered from RNA-antibody complexes was used for cDNA library preparation using the NEB Next Small RNA Library Prep Set for Illumina .

**Table S2. PA-ψ-seq true positive rates (sensitivity).** Known ψ sites in rRNA (105) were used to calculate the sensitivity of the PA-ᴪ-seq technique. Sensitivity was calculated as the number of PA-ψ-seq-detected known rRNA ψ sites / the total number of known rRNA ψ sites. Data obtained from Carlile *et al*., 2014, Taoka *et al*., 2018 and Lestrade & Weber 2008 (snoRNA Database) were used for comparison.

**Table S3. PA-ψ-seq specificity and false positive rates (FPR).** The false positive rate was calculated by counting U residues within a false, that is not previously reported, peak, where each U in the peak was counted as a false positive event). The false positive rate was then calculated as FPR = false positive events/(total U count in the whole rRNA sequence – known ψ count); while the specificity = 1-FPR.

**Table S4. List of known ψ sites identified using PA-ψ-seq.** List of previously reported ᴪ sites ([Lestrade and Weber 2006](#_ENREF_25); [Machnicka et al. 2013](#_ENREF_29); [Carlile et al. 2014](#_ENREF_6); [Schwartz et al. 2014](#_ENREF_40); [Li et al. 2015](#_ENREF_27); [Khoddami et al. 2019](#_ENREF_23)) also detected by PA-ᴪ-seq. The sequence and position of the ᴪ sites was obtained from the PIANO database ([Song et al. 2020](#_ENREF_41)). Experimentally validated human ᴪ site entries in the PIANO Database were first filtered by the higher RBP (RNA Binding Protein) binding region value and then each site was confirmed to be present in our data sets as a ~30nt peak for unique ᴪ sites or as a wider peak when several ᴪ sites are located close to each other, as shown in supplemental figure 1.

**Reference**

Machnicka MA, Milanowska K, Osman Oglou O, Purta E, Kurkowska M, Olchowik A, Januszewski W, Kalinowski S, Dunin-Horkawicz S, Rother KM, et al. 2013. MODOMICS: a database of RNA modification pathways—2013 update. *Nucleic Acids Res* 41: D262–D267. doi:10.1093/nar/gks1007

**Table S5. Discovered Pus1 dependent mRNA sites.** List of PUS1-dependent sites detected by PA-ᴪ-seq. The table describes the gene, chromosome and the start and end positions of peaks identified as a PUS1-dependent ᴪ sites.

**Table S6. Discovered TRUB1 dependent mRNA sites.**  List of TRUB1-dependent sites detected by PA-ᴪ-seq. The table describes the gene, chromosome and the start and end positions of peaks identified as a TRUB1-dependent ᴪ sites.

**Table S7. Discovered PUS7 dependent mRNA sites.**  List of PUS7-dependent sites detected by PA-ᴪ-seq. The table describes the gene, chromosome and the start and end positions of the peaks identified as PUS7-dependent ᴪ sites.

**Reference**

Machnicka MA, Milanowska K, Osman Oglou O, Purta E, Kurkowska M, Olchowik A, Januszewski W, Kalinowski S, Dunin-Horkawicz S, Rother KM, et al. 2013. MODOMICS: a database of RNA modification pathways—2013 update. *Nucleic Acids Res* **41:** D262–D267. doi:10.1093/nar/gks1007
