# Supplementary material
Source: HighWire-hosted journal article supplement (doi:10.1101/rna.078940.121)
Supplement: Supplemental_Tables.xlsx [file Supplemental_Tables.xlsx]

## Sheet: Info 
Table S1 PA-ᴪ-seq run list
List of all sequencing runs used in this study and the associated read depth
Table S2 PA-ᴪ-seq sensitivity as compared to known ψ sites on rRNA
List of ψ sites in rRNA detected by PA-ψ-seq and sensitivity calculations
Table S3 PA-ᴪ-seq False positive rate (FPR) & Specificity
List of false positive ψ sites in rRNA and FPR & Specificity calculations
Table S4 Known ψ sites
List of known ψ sites as listed on the PIANO database, detected with PA-ᴪ-seq
Table S5 Discovered Pus1 dependent mRNA sites
List of PUS1 dependent sites discovered with PA-ᴪ-seq
Table S6 Discovered Trub1 dependent mRNA sites
List of TRUB1 dependent sites discovered with PA-ᴪ-seq
Table S7 Discovered Pus7 dependent mRNA sites
List of Pus7 dependent sites discovered with PA-ᴪ-seq

## Sheet: Table S1 PA-ᴪ-seq run list
	PA-ᴪ-seq list
	Data set	Label	IP	Index#	Cell	source	reads passed filter (106)
	A	4SU	Ψ	1	CEM	viral	32.9549
	(Aug/2019)		Ψ	2	CEM	cellular	37.1431
			Ψ	3	293T	cellular	49.3785
	B	6SG	Ψ	1	293T	cellular	54.3186
	(Aug/2020)		Ψ	3	Pus1KO	cellular	54.0163
			Ψ	4	293T	viral	69.6123
			Ψ	6	Pus1KO	viral	24.5881
	C	4SU	Ψ	4	293T	cellular	60.886
	(Nov/2020)		Ψ	6	TRUB1KO	cellular	48.4559
			Ψ	12	Pus1KO	cellular	188.865
		6SG	Ψ	8	293T	cellular	66.5483
			Ψ	10	TRUB1KO	cellular	109.045
			Ψ	9	293T	viral	13.5653
			Ψ	11	TRUB1KO	viral	71.6069
			m6A	3	293T	viral	47.5641
	D	6SG	Ψ	3	293T	cellular	46.5554
	(Jan/2021)		Ψ	4	Pus7KO	cellular	44.033
	E	6SG	Ψ	1	293T	viral	30.1882
	(March/2021)		Ψ	2	Pus7KO	viral	26.3373

## Sheet: Table S2 Sensitivity
	Using known sites to calculate sensitivity					PA-ψ-seq
		Position in the snoRNA database	Carlile et al 2014	Taoka et al., 2018	snoRNA Database	CEM 4SU	293T 4SU	293T 6SG
	5.8S	54	+	+	-	-	-	-
		68	-	+	-	-	-	-
	18S	34	+	+	+	-	+	-
		36	+	+	+	-	+	-
		93	-	+	+	-	-	-
		105	-	+	+	-	-	+
		109	+	+	+	+	+	+
		119	+	+	+	+	+	+
		210	+	+	+	+	+	+
		218	+	+	+	-	-	-
		296	-	+	-	-	+	+
		406	+	+	+	+	+	+
		572	+	+	+	+	+	+
		609	+	+	+	+	+	+
		649	-	+	+	+	+	-
		651	-	+	+	+	+	-
		681	-	+	+	+	+	+
		686	+	+	+	+	+	+
		801	-	+	+	+	+	+
		814	-	+	+	+	+	+
		815	+	+	+	+	+	+
		822	+	+	+	+	+	-
		863	+	+	+	+	+	+
		866	+	+	+	+	+	+
		897	-	+	-	+	+	+
		918	+	+	+	+	+	+
		966	+	+	+	+	+	+
		1004	+	+	+	+	+	+
		1045	-	+	-	+	+	+
		1046	-	+	-	+	+	+
		1056	+	+	+	+	+	-
		1081	+	+	+	+	+	+
		1136	-	+	-	+	+	+
		1174	+	+	+	+	+	+
		1177	+	+	-	+	+	+
		1232	-	+	-	+	+	+
		1238	-	+	+	+	+	+
		1244	-	+	+	+	+	+
		1347	-	+	+	+	+	+
		1367	-	+	+	-	+	-
		1445	+	+	+	+	-	+
		1625	+	+	+	+	+	-
		1643	+	+	+	+	+	+
		1692	+	+	+	+	+	+
	28S	1523	+	+	+	+	+	+
		1569	+	+	+	+	+	+
		1664	+	+	+	+	+	+
		1670	+	+	+	+	+	+
		1731	-	+	+	+	+	+
		1766	-	+	+	+	+	+
		1768	-	+	-	+	+	+
		1769	-	+	+	+	+	+
		1779	+	+	+	+	+	+
		1847	-	+	+	+	+	+
		1849	+	+	+	+	+	+
		2495	-	+	+	-	-	-
		2619	-	+	-	+	+	+
		2826	-	+	-	+	+	+
		2830	-	+	-	+	+	+
		3616	+	+	+	+	+	+
		3618	+	+	+	+	+	+
		3674	-	+	+	+	+	+
		3694	+	+	+	-	-	+
		3709	-	+	+	-	-	-
		3713	-	+	+	-	-	-
		3737	-	+	+	+	+	+
		3741	-	+	+	+	+	+
		3743	-	+	+	+	+	+
		3747	+	+	+	+	+	+
		3749	+	+	+	+	+	+
		3797	-	+	+	+	+	+
		3801	-	+	+	+	+	+
		3823	-	+	+	+	+	-
		3830	+	+	+	+	+	-
		3832	+	+	+	+	+	-
		3863	-	+	+	+	+	+
		3899	+	+	+	-	-	-
		3938	+	+	+	+	+	+
		4263	-	+	+	+	+	+
		4266	-	+	+	+	+	+
		4269	+	+	+	+	+	+
		4282	+	+	+	-	-	-
		4323	-	+	+	-	+	+
		4331	-	+	+	+	+	+
		4373	-	+	+	+	+	+
		4390	-	+	+	-	-	-
		4393	-	+	+	-	-	-
		4401	-	+	+	-	+	-
		4412	+	+	+	-	-	-
		4427	+	+	+	-	+	+
		4441	+	+	+	-	-	+
		4463	-	+	-	-	+	-
		4470	-	+	+	-	+	-
		4491	-	+	+	+	+	+
		4501	-	+	+	+	+	+
		4522	-	+	+	+	+	-
		4546	+	+	+	+	+	-
		4549	+	+	+	+	+	-
		4598	+	+	+	+	+	-
		4606	-	+	+	+	+	+
		4643	-	+	+	+	+	+
		4659	+	+	+	-	-	-
		4937	+	+	+	-	-	-
		4966	-	+	+	+	+	+
		4975	+	+	+	-	+	-
	Total True positive (+)		52	105	91	78	87	72
	Total false negative (-)		53	0	14	26	17	32
	Sensitivity (%)		49.5238	100	86.6	74.2857	82.8571	68.5714

## Sheet: Table S3 FPR
		Using peaks that don't cover a known site to estimate the False positive rate
			Counting likely Us close to the summit of peak			Only counting a single U per peak
	U closest to Peak summit		CEM 4SU	293T 4SU	293T 6SG	CEM 4SU	293T 4SU	293T 6SG
	5.8S	22	+	+	+	+	+	+
	18S	344	-	-	+	-	-	+
		345	-	-	+
		443	+	+	+	+	+	+
		511	-	-	+	-	-	+
		514	-	-	+
		524	-	-	+
		530	-	-	+
		747	-	-	+	-	-	+
		749	-	-	+
		1288	+	+	+	+	+	+
		1289	+	+	+
		1326	+	+	+	+	+	+
		1329	+	+	+
		1390	-	-	+	-	-	+
		1392	-	-	+
		1511	+	+	+	+	+	+
		1519	+	+	+
		1608	+	+	+	+	+	+
		1741	-	-	+	-	-	+
		1746	-	-	+
		1761	-	-	+
		1786	+	+	+	+	+	+
	28S	147	+	+	+	+	+	+
		221	+	+	-	+	+	-
		587	+	+	+	+	+	+
		719	+	+	+	+	+	+
		770	+	+	-	+	+	-
		773	+	-	-
		958	+	+	+	+	+	+
		1146	+	+	+	+	+	+
		1196	+	+	+	+	+	+
		1272	+	+	+	+	+	+
		1335	+	+	+	+	+	+
		1343	+	+	+
		1961	+	+	+	+	+	+
		1973	+	+	+
		2084	+	+	+	+	+	+
		2133	+	+	+	+	+	+
		2316	+	+	+	+	+	+
		2337	+	+	+	+	+	+
		2339	+	+	+
		2340	+	+	+
		2431	+	+	+	+	+	+
		2434	+	+	+
		2472	+	+	+	+	+	+
		2541	+	+	+	+	+	+
		2705	+	+	+	+	+	+
		2754	+	+	+	+	+	+
		2756	+	+	+
		2895	+	+	+	+	+	+
		2901	+	+	+
		3040	+	+	+	+	+	+
		3042	+	+	+
		3044	+	+	+
		3046	+	+	+
		3382	+	+	+	+	+	+
		4158	+	+	+	+	+	+
		4159	+	+	+
		4160	+	+	+
		4212	+	+	+	+	+	+
		4829	+	+	-	+	+	-
		4915	-	+	+	-	+	+
	Total false positive (+)		49	49	59	33	34	36
	False positive rate		0.0205623	0.0205623	0.0246552	0.0139417	0.0143581	0.0151899
	Specificity (%)		98	98	98	99	99	98
	Total T's in the region	2439
	known pseudoU sites	105
	True negatives	2334

## Sheet: Table S4 Known ψ sites 
	Reported Pseudouridine modifications detected with PA-ᴪ-seq
	Gene	Sequence (Pseudouridine in red)	Strand	Reported position (PIANO database )	Gene type/Gene region	Reference
1	NOTCH2	GAAACTCTGGTGGAGGTCCGψAGCAGTCCTGATGTGCAAAT	-	chr1: 120544003	protein coding/intronic	Lestrade & Weber, 2006.
2	NOTCH2NL	GAAACTCTGGTGGAGGTCCGψAGCAGTCCTGATGTGCAAAT	+	chr1:145277372	other/intronic	Lestrade & Weber, 2006.
3	MRPS21	CAGTTTTCTCTCCATCTCTTψTCTTTGTACAATCCCATTTC	+	chr1:150280720	other/UTR3	Li et al., 2015.
4	HFM1	GCCAAGCGTTCATAGCGACGψCGCTTTTTGATCCTTCGATG	-	chr1:91852842	protein coding/intronic	Lestrade & Weber, 2006; Carlile et al. 2014.
5	HFM1	GTCGGCTCTTCCTATCATTGψGAAGCAGAATTCACCAAGCG	-	chr1:91852854	protein coding/intronic	Lestrade & Weber, 2006; Carlile et al. 2014.
6	HFM1	ATAGCGACGTCGCTTTTTGAψCCTTCGATGTCGGCTCTTCC	-	chr1:91852869	protein coding/intronic	Lestrade & Weber, 2006; Carlile et al. 2014.
7	HFM1	TTTGATCCTTCGATGTCGGCψCTTCCTATCATTGTGAAGCA	-	chr1:91852880	protein coding/intronic	Lestrade & Weber, 2006; Carlile et al. 2014.
8	HFM1	TTACCACAGGGATAACTGGCψTGTGGCGGCCAAGCGTTCAT	-	chr1:91852908	protein coding/intronic	Lestrade & Weber, 2006; Carlile et al. 2014.
9	HFM1	AAAAGCTCGCTTGATCTTGAψTTTCAGTACGAATACAGACC	-	chr1:91853012	protein coding/intronic	Lestrade & Weber, 2006; Carlile et al. 2014.
10	HFM1	GGCAAAAGCTCGCTTGATCTψGATTTTCAGTACGAATACAG	-	chr1:91853015	protein coding/intronic	Lestrade & Weber, 2006; Carlile et al. 2014.
11	ANKRD30BL	AGTCGGAGGTTCGAAGACGAψCAGATACCGTTGTAATTCCG	-	chr2:133012727	other/intergenic	Lestrade & Weber, 2006.
12	ANKRD30BL	CAAGAACGAAAGTCGGAGGTψCGAAGACGATCAGATACCGT	-	chr2:133012737	other/intergenic	Carlile et al. 2014.
13	ANKRD30BL	TCAAGAACGAAAGTCGGAGGψTCGAAGACGATCAGATACCG	-	chr2:133012738	other/intergenic	Li et al., 2015.
14	ANKRD30BL	TTCGGAACTGAGGCCATGATψAAGAGGGACGGCCGGGGGCA	-	chr2:133012863	other/intergenic	Lestrade & Weber, 2006; Carlile et al. 2014.
15	AGBL5	GTTGGTAGAGCGGAGGACTGψAGTGGATAGGGCGTGGCAAT	+	chr2:27273684	protein coding/intronic	Machnicka et al., 2013.
16	AGBL5	GCAATCCTTAGGTCGCTGGTψCGATTCCGGCTCGAAGGACT	+	chr2:27273720	protein coding/intronic	Machnicka et al., 2013; Schwartz et al., 2014.
17	RPL35A	AATCAATAAATAAATGTGGAψTTGTGCTCTTGTATTTTTAA	+	chr3:197682675	protein coding/UTR3	Li et al., 2015.
18	RPL15	AGGTTACGTTATATATAGGAψTCGTGTTCGCCGTGGTGGCC	+	chr3:23959949	protein coding/CDS	Li et al., 2015.
19	GSTA4	AAGCTCTCAAGGTCCATTTGψAGGAGAACGTAGGGTAGTCA	+	chr6:52860667	misc_RNA/ncRNA_exonic	Carlile et al. 2014.
20	LUC7L2	CTAAGCCAGGGATTGTGGGTψCGAGTCCCATCTGGGGTGGC	+	chr7:139025500	protein coding/intronic	Schwartz et al., 2014.
21	ABCA13	CTATTCAGACATTTGGTGTAψGTGCTTGGCTGAGGAGCCAA	+	chr7:48672378	protein coding/intronic	Lestrade & Weber, 2006.
22	SLCO5A1	CACAGCCAAGGGAACGGGCTψGGCGGAATCAGCGGGGAAAG	-	chr8:70602394	protein coding/intronic	Lestrade & Weber, 2006; Carlile et al. 2014.
23	SLCO5A1	GGTGTTGACGCGATGTGATTψCTGCCCAGTGCTCTGAATGT	-	chr8:70602583	protein coding/intronic	Lestrade & Weber, 2006; Carlile et al. 2014.
24	GCNT1	GGGAACCTGGCGCTAAACCAψTCGTAGACGACCTGCTTCTG	+	chr9:79186853	other/downstream	Lestrade & Weber, 2006; Carlile et al. 2014.
25	GCNT1	GGAACCTGGCGCTAAACCATψCGTAGACGACCTGCTTCTGG	+	chr9:79186854	other/downstream	Lestrade & Weber, 2006; Carlile et al. 2014.
26	RPS24	TTCATGACCAACCGACTACTψCAGAGGAAACAAATGGTAAG	+	chr10:79795160	protein coding/CDS	Li et al., 2015.
27	WDR74	CTCTATCCGAGGACAATATAψTAAATGGATTTTTGGAAATA	-	chr11:62609191	snRNA/ncRNA_exonic	Lestrade & Weber, 2006; Schwartz et al., 2014.
28	WDR74	TCCTCTATCCGAGGACAATAψATTAAATGGATTTTTGGAAA	-	chr11:62609193	snRNA/ncRNA_exonic	Lestrade & Weber, 2006; Carlile et al. 2014.
29	WDR74	TCAGTTTAATATCTGATACGψCCTCTATCCGAGGACAATAT	-	chr11:62609213	snRNA/ncRNA_exonic	Lestrade & Weber, 2006.
30	WDR74	CTGTTCTTATCAGTTTAATAψCTGATACGTCCTCTATCCGA	-	chr11:62609222	snRNA/ncRNA_exonic	Lestrade & Weber, 2006.
31	WDR74	ATCTGTTCTTATCAGTTTAAψATCTGATACGTCCTCTATCC	-	chr11:62609224	snRNA/ncRNA_exonic	Lestrade & Weber, 2006.
32	WDR74	TAGTATCTGTTCTTATCAGTψTAATATCTGATACGTCCTCT	-	chr11:62609228	snRNA/ncRNA_exonic	Lestrade & Weber, 2006; Carlile et al. 2014.
33	WDR74	AGATCAAGTGTAGTATCTGTψCTTATCAGTTTAATATCTGA	-	chr11:62609238	snRNA/ncRNA_exonic	Lestrade & Weber, 2006; Carlile et al. 2014.
34	WDR74	AAGATCAAGTGTAGTATCTGψTCTTATCAGTTTAATATCTG	-	chr11:62609239	snRNA/ncRNA_exonic	Lestrade & Weber, 2006.
35	WDR74	CTAAGATCAAGTGTAGTATCψGTTCTTATCAGTTTAATATC	-	chr11:62609241	snRNA/ncRNA_exonic	Lestrade & Weber, 2006; Carlile et al. 2014.
36	WDR74	GGCTAAGATCAAGTGTAGTAψCTGTTCTTATCAGTTTAATA	-	chr11:62609243	snRNA/ncRNA_exonic	Lestrade & Weber, 2006; Carlile et al. 2014.
37	PDE3A	GGTGCATGGCCGTTCTTAGTψGGTGGAGCGATTTGTCTGGT	+	chr12:20704427	protein coding/intronic	Lestrade & Weber, 2006; Carlile et al. 2014.
38	PDE3A	GGTGGAGCGATTTGTCTGGTψAATTCCGATAACGAACGAGA	+	chr12:20704448	protein coding/intronic	Lestrade & Weber, 2006.
39	ALG10	GGAACCGCAGGTTCAGACATψTTGTGTATGTGCTTGGCTTT	-	chr12:34372626	lincRNA/upstream	Lestrade & Weber, 2006.
40	SNORD59A	ATGATTTTATCAAAATGACTψTCGTTCTTCTGAGTTTGCTG	-	chr12:57038856	snoRNA/ncRNA_exonic	Lestrade & Weber, 2006; Khoddami et al., 2019.
41	RPL4	AAGCTTGCTCCTGGTGGGCAψGTGGGACGTTTCTGCATTTG	-	chr15:66793385	protein coding/CDS	Khoddami et al., 2019.
42	LINC00273	TGTAATTGGAATGAGTCCACψTTAAATCCTTTAACGAAGAT	+	chr16:33963069	lincRNA/upstream	Lestrade & Weber, 2006; Carlile et al. 2014.
43	LINC00273	ATTCCAGCTCCAATAGCGTAψATTAAAGTTGCTGCAGTTAA	+	chr16:33963147	lincRNA/upstream	Lestrade & Weber, 2006; Carlile et al. 2014.
44	LINC00273	CTGGATACCGCAGCTAGGAAψAATGGAATAGGACCGCGGTT	+	chr16:33963359	lincRNA/upstream	Lestrade & Weber, 2006; Carlile et al. 2014.
45	LINC00273	TGCACCGCTAGAGGTGAAATψCTTGGACCGGCGCAGTTTGG	+	chr16:33963462	lincRNA/upstream	Lestrade & Weber, 2006.
46	LINC00273	ACTGCGAATGGCTCATTAAAψCAGTTATGGTTCTTTTGGTC	+	chr16:33962601	lincRNA/upstream	Lestrade & Weber, 2006.
47	LINC00273	AGTGGAGCCTGCGGCTTAATψTGACTCAACATGGGAAAAAT	+	chr16:33963747	lincRNA/upstream	Lestrade & Weber, 2006.
48	LINC00273	GTCGGCGTCCCCCAACTTCTψAGAGGGACAAGTGGCCTTCA	+	chr16:33963945	lincRNA/upstream	Lestrade & Weber, 2006.
49	LINC00273	GGATGGGGGATTGCAATTATψCCCCATGAAGGAGGAATTTC	+	chr16:33964124	lincRNA/upstream	Lestrade & Weber, 2006.
50	LINC02405	CTGGGTCGGGGTTTCGTACGψAGCAGAGCAGCTCCCTCGCT	-	chr16:33963360	lincRNA/downstream	Lestrade & Weber, 2006; Carlile et al. 2014.
51	SRSF1	CAGGATTGTTTAAATTTAGTψAACTCCATACTCTTCAGACT	-	chr17:56082545	other/UTR5;UTR3	Schwartz et al., 2014.
52	ZNF492	TGGTGGAGCGATTTGTCTGGψTAATTCCGATAATAAATGTC	-	chr19: 22877633	antisense/ncRNA_intronic	Lestrade & Weber, 2006.
53	ZNF492	GTCGGCGTCCCCCAACTTCTψAGAGGGACAAGTGGCGTTTA	-	chr19:22877676	antisense/ncRNA_intronic	Lestrade & Weber, 2006.
54	MIR3687-1	CCTACCATGGTGACCACGGGψGACGGGGAATCAGGGTTCGA	+	chr21: 9827410	miRNA/downstream	Lestrade & Weber, 2006; Carlile et al. 2014.
55	MIR3687-1	CTGCCAGTAGCATATGCTTGψCTCAAAGATTAAGCCATGCA	+	chr21:9827038	miRNA/downstream	Lestrade & Weber, 2006; Carlile et al. 2014.
56	MIR3687-1	GCCAGTAGCATATGCTTGTCψCAAAGATTAAGCCATGCATG	+	chr21:9827040	miRNA/downstream	Lestrade & Weber, 2006; Carlile et al. 2014.
57	MIR3687-1	CGGTACAGTGAAACTGCGAAψGGCTCATTAAATCAGTTATG	+	chr21:9827097	miRNA/downstream	Lestrade & Weber, 2006; Carlile et al. 2014.
58	MIR3687-1	ACTGCGAATGGCTCATTAAAψCAGTTATGGTTCCTTTGGTC	+	chr21:9827109	miRNA/downstream	Lestrade & Weber, 2006; Carlile et al. 2014.
59	MIR3687-1	CGAATGGCTCATTAAATCAGψTATGGTTCCTTTGGTCGCTC	+	chr21:9827113	miRNA/downstream	Lestrade & Weber, 2006; Carlile et al. 2014.
60	MIR3687-1	GAATGGCTCATTAAATCAGTψATGGTTCCTTTGGTCGCTCG	+	chr21:9827114	miRNA/downstream	Lestrade & Weber, 2006; Carlile et al. 2014.
61	MIR3687-1	ATTAAATCAGTTATGGTTCCψTTGGTCGCTCGCTCCTCTCC	+	chr21:9827123	miRNA/downstream	Lestrade & Weber, 2006; Carlile et al. 2014.
62	MIR3687-1	TTAAATCAGTTATGGTTCCTψTGGTCGCTCGCTCCTCTCCT	+	chr21:9827124	miRNA/downstream	Lestrade & Weber, 2006; Carlile et al. 2014.
63	MIR3687-1	GACCCCCTTCGCGGGGGGGAψGCGTGCATTTATCAGATCAA	+	chr21:9827214	miRNA/downstream	Lestrade & Weber, 2006; Carlile et al. 2014.
64	MIR3687-1	TCGCGGGGGGGATGCGTGCAψTTATCAGATCAAAACCAACC	+	chr21:9827222	miRNA/downstream	Lestrade & Weber, 2006; Carlile et al. 2014.
65	MIR3687-1	CGCGGGGGGGATGCGTGCATψTATCAGATCAAAACCAACCC	+	chr21:9827223	miRNA/downstream	Lestrade & Weber, 2006.
66	MIR3687-1	GCGGGGGGGATGCGTGCATTψATCAGATCAAAACCAACCCG	+	chr21:9827224	miRNA/downstream	Lestrade & Weber, 2006; Carlile et al. 2014.
67	TEKT4P2	CCTACCATGGTGACCACGGGψGACGGGGAATCAGGGTTCGA	+	chr21:9827410	other/intergenic	Lestrade & Weber, 2006; Carlile et al. 2014.
68	RNR2	TTGGGTGCTAATGGTGGAGTψAAAGACTTTTTCTCTGATTT	-	chrM:15974	Mt_tRNA/ncRNA_exonic	Machnicka et al., 2013.
69	RNR2	ATTAGAATCTTAGCTTTGGGψGCTAATGGTGGAGTTAAAGA	-	chrM:15989	Mt_tRNA/ncRNA_exonic	Machnicka et al., 2013.
70	TTTY23	GATCCATTGGAGGGCAAGTCψGGTGCCAGCAGCCACAGTAA	+	chrY:10035473	processed_pseudogene/ncRNA_exonic	Lestrade & Weber, 2006.
71	TTTY23	AGTCGGAGTTTCGAAGACGAψCAGATACCGTCGTTGTTCCG	+	chrY:10035901	processed_pseudogene/ncRNA_exonic	Lestrade & Weber, 2006.
72	TTTY23	TGATGAAGAATGCAGCTAGCψGTGAGAATTAATGTGAATTG	+	chrY:10037817	processed_pseudogene/ncRNA_exonic	Lestrade & Weber, 2006.
73	TTTY23	GCTAGCTGTGAGAATTAATGψGAATTGCAGGACACATTGAT	+	chrY:10037831	processed_pseudogene/ncRNA_exonic	Lestrade & Weber, 2006.

## Sheet: Table S5 Pus1 sites
	Gene	Chr	Peak start	Peak end
	STT3A	chr11	125465892	125465924
	WNK1	chr12	1020371	1020403
	TXNRD1	chr12	104742783	104742815
	ATP11A	chr13	113538456	113538488
	AP5M1	chr14	57756555	57756587
	ARID4A	chr14	58838842	58838875
	GLS	chr2	191797613	191797645
	SERP1	chr3	150260357	150260389
	MEF2C	chr5	88017279	88017311
	ASAH1	chr8	17914344	17914376
	PTDSS1	chr8	97346067	97346099
	CETN2	chrX	151995937	151995969

## Sheet: Table S6 TRUB1 sites
	Gene	Chr	Peak start	Peak end
	CKLF	chr16	66592177	66592209
	CMTM6	chr3	32523851	32523883
	CANX	chr5	179149903	179149935
	PTK7	chr6	43129411	43129443
	GOLGA7	chr8	41368320	41368352
	CFAP157/PTRH1	chr9	130476266	130476298

## Sheet: Table S7 Pus7 sites
	Gene	Chr	Peak start	Peak end
	C1orf43	chr1	154179527	154179596
	MPZL1	chr1	167758680	167758712
	TMEM9	chr1	201104586	201104618
	LBR	chr1	225590994	225591026
	RSU1	chr10	16635260	16635292
	ADO	chr10	64566110	64566142
	CHUK	chr10	101948878	101948910
	NHLRC2	chr10	115668831	115668863
	TMEM126B	chr11	85346886	85346918
	SLC38A2	chr12	46765015	46765047
	TFCP2	chr12	51488660	51488703
	NAP1L!	chr12	76446994	76447069
	RPL6	chr12	112846054	112846087
	SLC15A4	chr12	129283871	129283903
	STK24	chr13	99112627	99112661
	DAD1	chr14	23038901	23038933
	SUSD6	chr14	70181665	70181697
	PARP6	chr15	72563398	72563430
	EDC3	chr15	74924829	74924861
	MAZ	chr16	29821830	29821862
	UBE2G1	chr17	4175319	4175351
	NCOR1	chr17	15946800	15946832
	TMEM98	chr17	31268468	31268500
	MED24	chr17	38175574	38175606
	MIDN	chr19	1257868	1257900
	TPM4	chr19	16212365	16212397
	FOXN2	chr2	48604742	48604774
	BRWD1	chr21	40669474	40669506
	TRA2B	chr3	185634958	185634990
	GOLPH3	chr5	32125462	32125494
	PPP2CA	chr5	133537648	133537680
	GLO1	chr6	38644482	38644514
	SESN1	chr6	109319868	109319900
	PSMG3	chr7	1609381	1609443
	TTYH3	chr7	2704319	2704351
	KDELR2	chr7	6513847	6513879
	CCT6A	chr7	56120119	56120151
	C7orf73	chr7	135358996	135359028
	B4GALT1	chr9	33111284	33111316
	SET	chr9	131457141	131457175
	ATP6AP2	chrX	40448259	40448291
	PRPS1	chrX	106894130	106894162
	EMD	chrX	153609329	153609361
